# Supplementary material for: Age associated non-linear regulation of redox homeostasis in the anucleate platelet: Implications for CVD risk patients
Source: PubMed Central journal article supplement — eBioMedicine. 2019 May 24;44:28–40. doi: 10.1016/j.ebiom.2019.05.022 (PMC6604369; doi:10.1016/j.ebiom.2019.05.022), 2019-05-24
Supplement: mmc1.pdf [file mmc1.pdf]

## SUPPLEMENTAL FIGURES.

### Age associated non-linear regulation of redox homeostasis in the anucleate platelet: Implications for CVD risk patients

Jain et. al.

#### Supplementary Figure S1

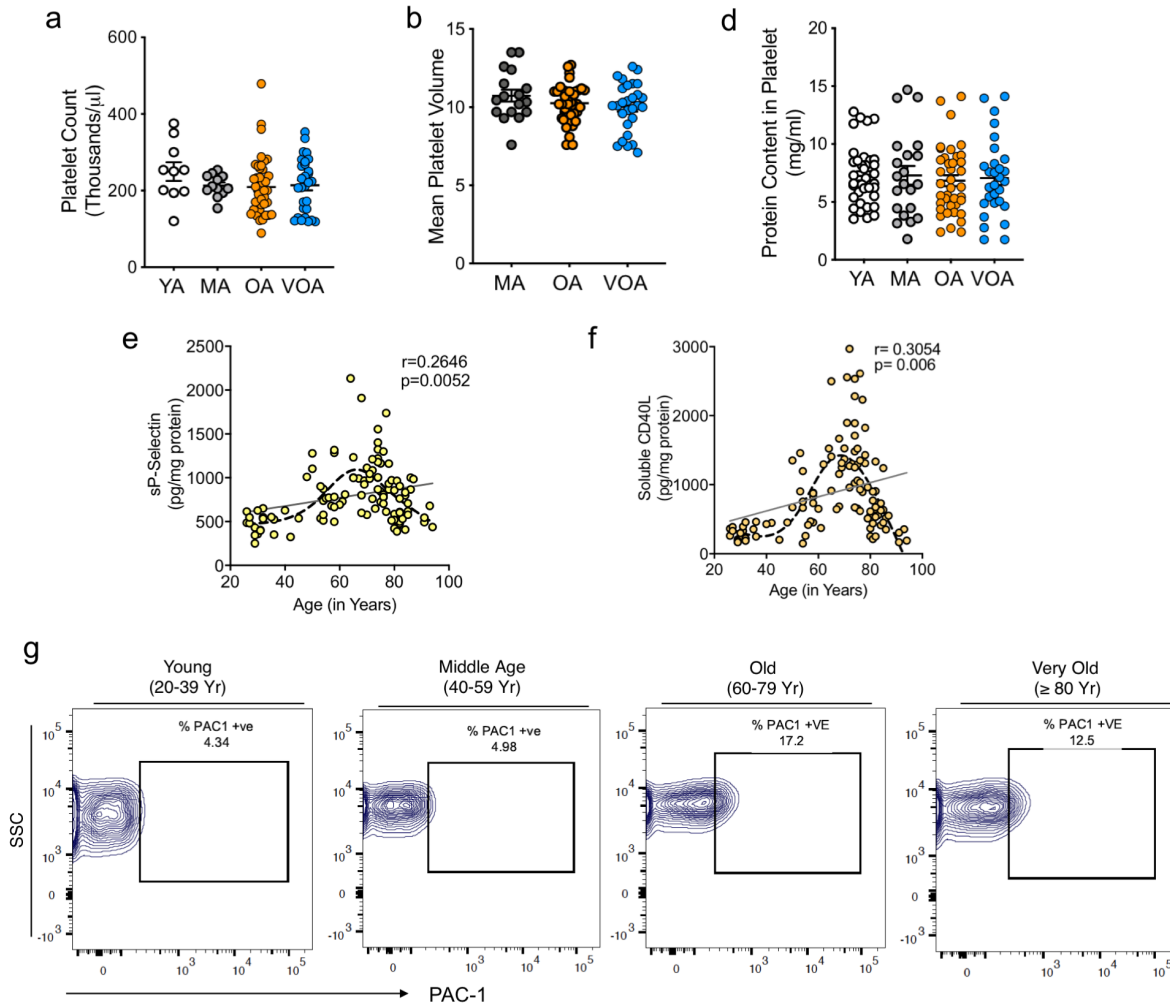

**Supplementary Figure 1: Platelet activation is significantly lower in the very old ( $\geq 80$  year) population as compared to the old (60-79 year) population.** **a.** Platelet counts across various age subsets. **b.** Mean platelet volume (MPV) across the human cohort. **c.** Platelet protein content in the human cohort. **d-e.** Correlation curve between sP-Selectin and sCD40L, respectively, and patient age. Solid line represents the linear regression curve. Dash line represents the trendline generated using spline curve fitting. **f.** Surface platelet activation (Activated  $\alpha_{IIb}\beta_3$ ) was assessed by the binding of platelets to FITC-conjugated PAC-1 antibody as shown in the representative contour plot. Values expressed as Mean  $\pm$  SEM. Experiments performed in a minimum of  $n=10$  samples per group.

## Supplementary Figure 2

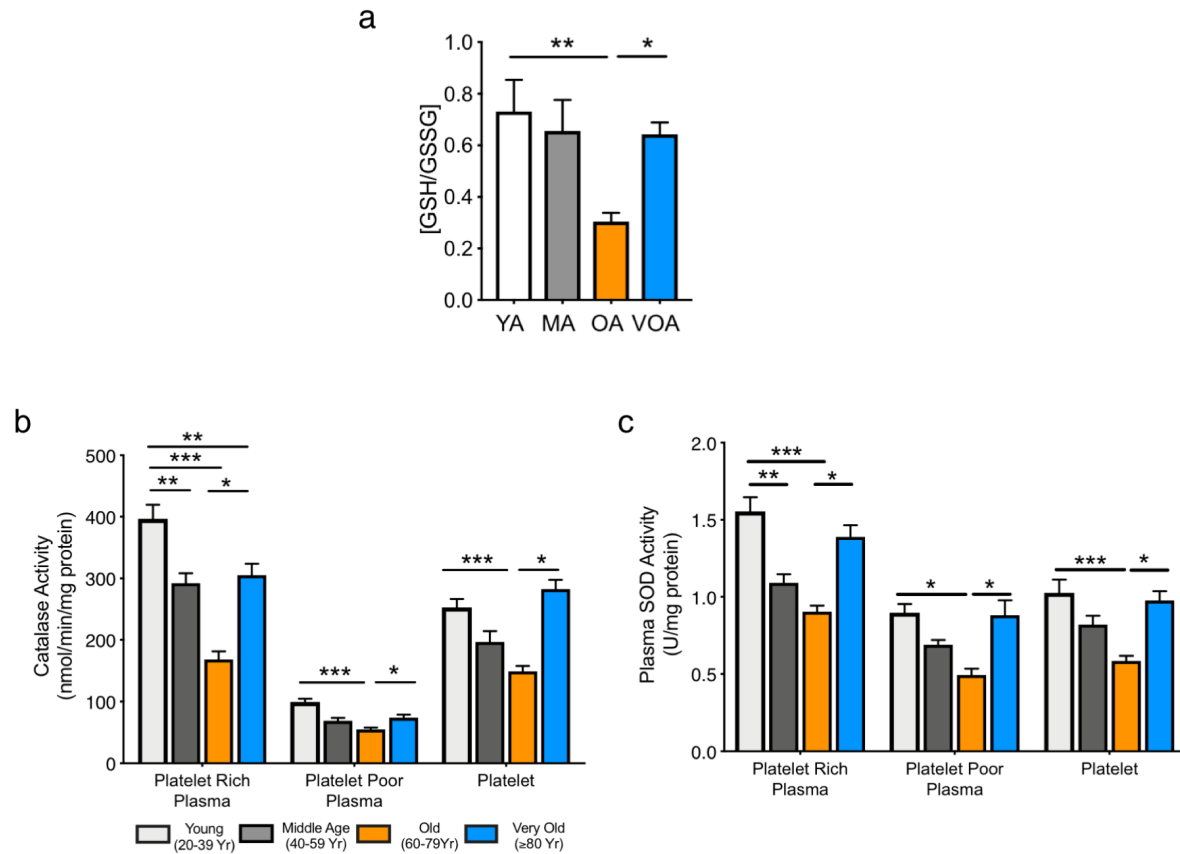

**Supplementary Figure 2: Reduced oxidative damage and elevated enzymatic antioxidant levels are in the platelets from the very old (≥80 year) population.** **a:** Ratio of reduced to oxidised glutathione, GSH/GSSG is reflective of the redox status of the cell. **b-c.** Catalase and SOD activity measured in the PRP, PPP and platelets in the different age subsets (YA n=12, MA n=12, OA n=20, VOA n=20). Values expressed as Mean ± SEM. \* $p < 0.05$ ; \*\* $p < 0.005$ . Experiments performed in a minimum of n=10 samples per group.

### Supplementary Figure 3

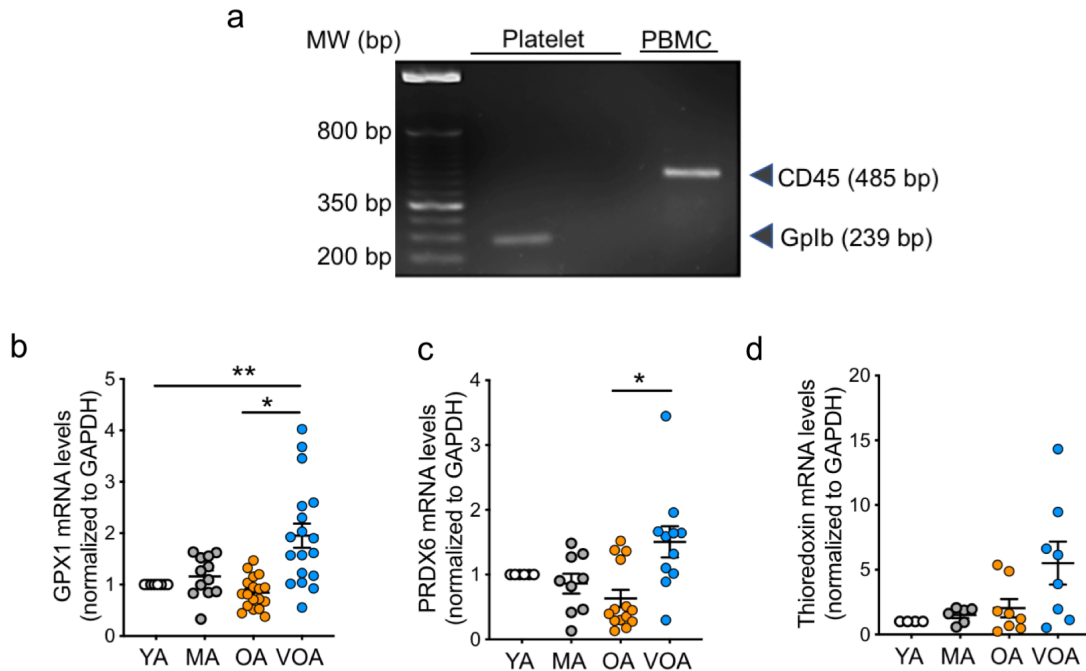

**Supplementary Figure 3: Increased antioxidant gene expression in the platelets from the very old ( $\geq 80$  year) population.** **a.** Agarose gel showing the results of RT-PCR to confirm the absence of leucocyte contamination in the platelet RNA sample. **b-d.** Quantitative Real-time PCR (qRT-PCR) was used to measure mRNA expression levels of *Gpx1*, *Prdx6* and *Thioredoxin* as a validation of the array data. Results are expressed as fold change over Young Healthy controls. Values expressed as Mean  $\pm$  SEM. \* $p < 0.05$ ; \*\* $p < 0.005$ . Experiments performed in a minimum of  $n=10$  samples per group.

**Supplementary Figure 4**

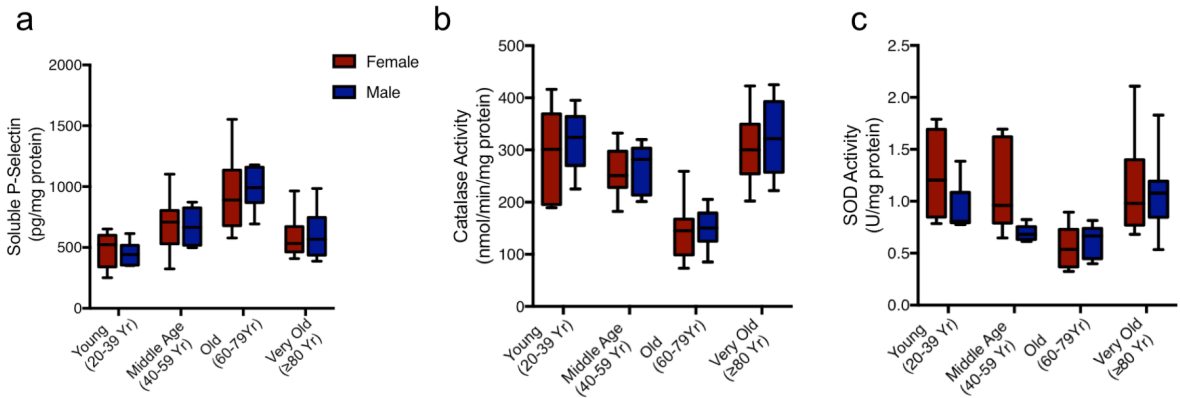

**Supplementary Figure 4: Levels of sP-selectin and platelet antioxidants are independent of gender.**

**a-c.** Graphs depict the differences in the levels of sP-selectin, Catalase activity and SOD activity shown between genders in relation to age. No significant changes seen in the levels in women vs men. Values are expressed as Min to Max ± SEM in the box and whiskers plots

## Supplementary Figure 5

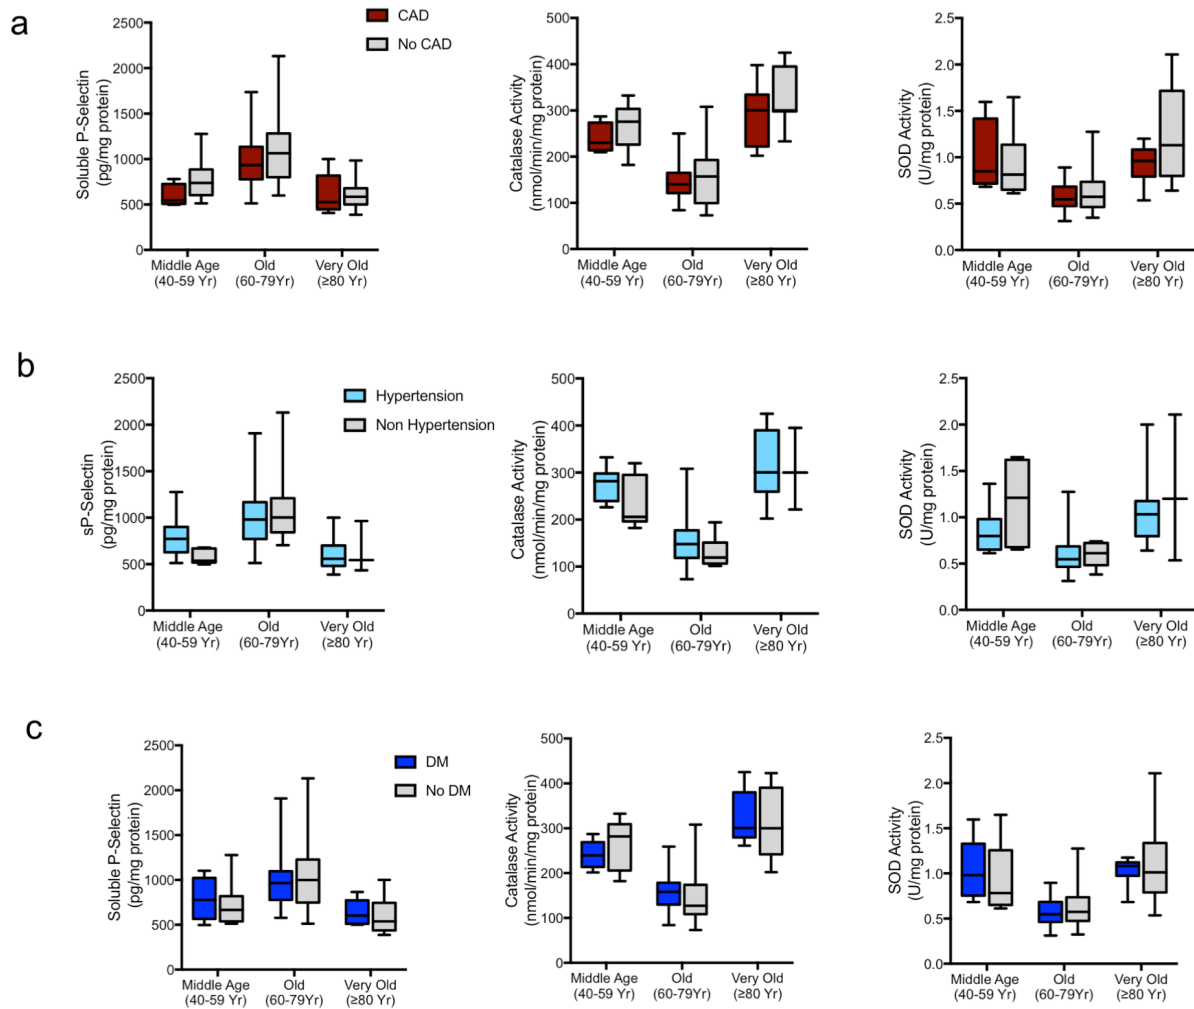

**Supplementary Figure 5: Levels of P-selectin and platelet antioxidants are independent of comorbidities, which differ significantly between the cohorts.** Each panel represents the levels of sP-selectin, Catalase activity and SOD activity in the cohort of patients recruited from the cardiovascular clinic segregated on the basis of the presence of documented CAD **(a)**, Hypertension **(b)** and Diabetes **(c)**. Values are expressed as Min to Max  $\pm$  SEM in the box and whiskers plots.

## Supplementary Figure 6

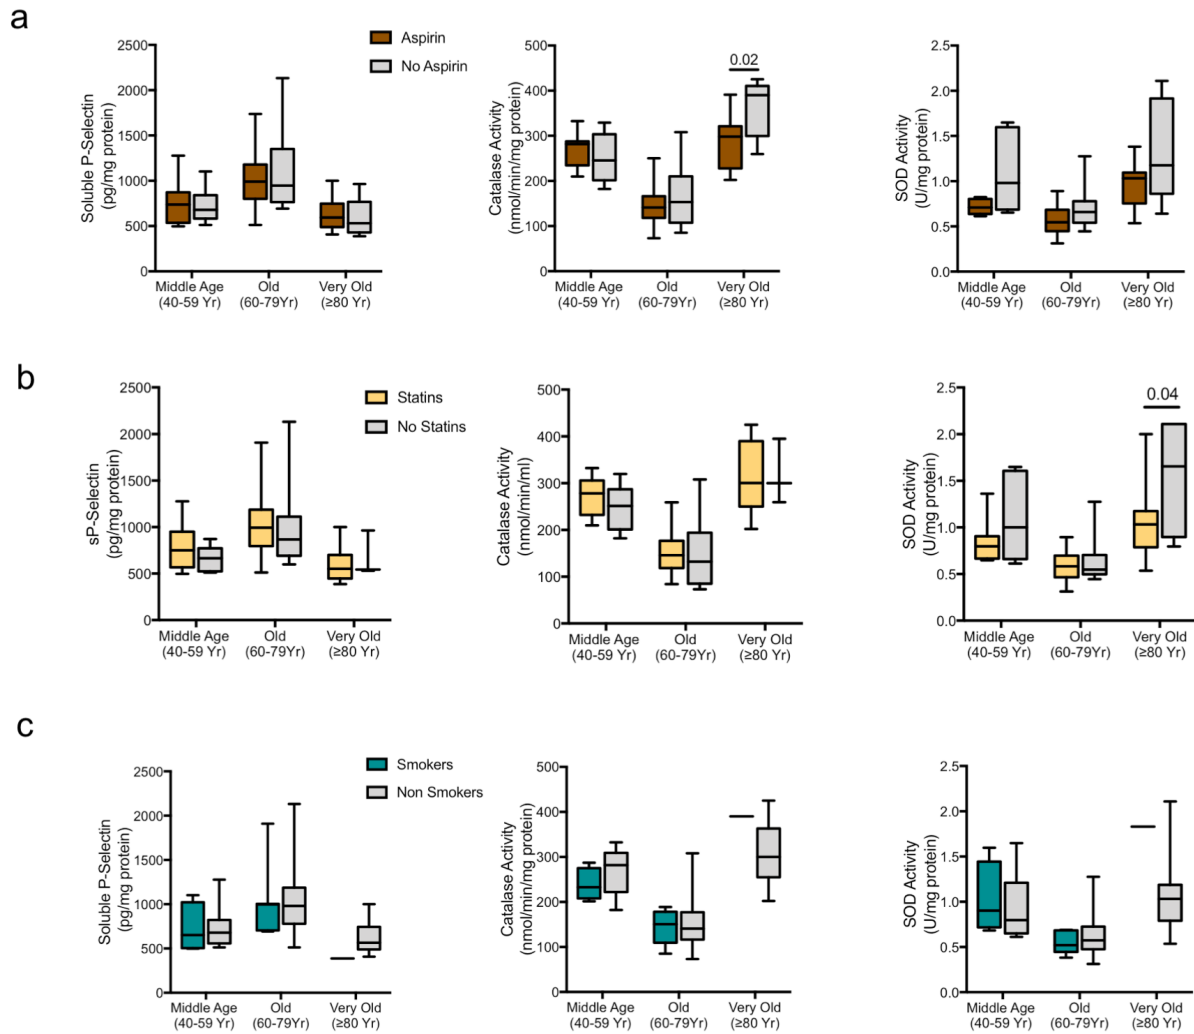

**Supplementary Figure 6: Levels of P-selectin and platelet antioxidants are independent of clinical characteristics .** Each panel represents the levels of sP-selectin, Catalase activity and SOD activity in the Middle Age, Old Age and Very Old Age groups on the basis of the presence of Aspirin **(a)**, Statins **(b)** and Smoking Status **(c)**. Values are expressed as Min to Max  $\pm$  SEM in the box and whiskers plots.

## Supplementary Figure 7

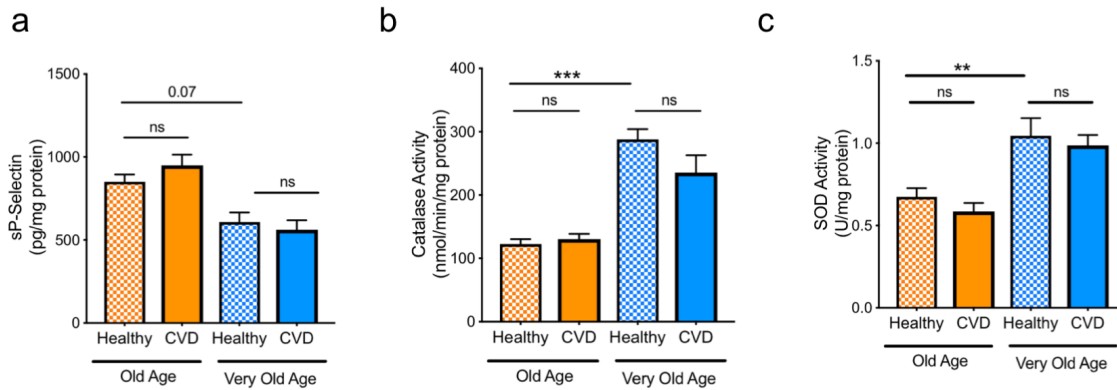

**Supplementary Figure 7: Levels of sP-selectin and platelet antioxidants are independent of cardiovascular diseases. a-c.** Graphs show the levels of sP-selectin, Catalase activity and SOD activity respectively between healthy subjects and CVD patients for the Old Age and very Old Age cohorts. Values are expressed as Mean  $\pm$  SEM. \*\* $p < 0.005$ ; \*\*\* $p < 0.001$ . Experiments performed in a minimum of  $n=6$  samples per group.
